# Supplementary material for: Cross-sectional analysis of the core of silicon microparticles formed via zinc reduction of SiCl4
Source: Royal Society of Chemistry journal article supplement (doi:10.1039/c7ce00296c), 2017-01-01
Supplement: c7ce00296c1.pdf [file c7ce00296c1.pdf]

**Electronic Supplemental Information (ESI)**

**Cross-sectional analysis of the core of silicon microparticles formed via zinc reduction of SiCl<sub>4</sub>**

Susumu Inasawa,<sup>a\*</sup> Yamato Ono,<sup>b</sup> Takuho Mizuguchi,<sup>a</sup> Akinobu Sunairi,<sup>a</sup> Shin-ichi Nakamura,<sup>c</sup> Yoshiko Tsuji<sup>d</sup> and Yukio Yamaguchi<sup>b</sup>

<sup>a</sup> *Graduate School of Bio-Applications and Systems Engineering (BASE), Tokyo University of Agriculture and Technology, 2-24-16 Nakacho, Koganei, Tokyo, 184-8588, Japan*

<sup>b</sup> *Department of Chemical System Engineering, Graduate School of Engineering, The University of Tokyo, 7-3-1 Hongo, Bunkyo-ku, Tokyo, 113-8656, Japan*

<sup>c</sup> *Center for Instrumental Analysis, Aoyama Gakuin University, 5-10-1 Fuchinobe, Sagamihara, Kanagawa, 229-8558, Japan*

<sup>d</sup> *Environmental Science Center, The University of Tokyo, 7-3-1 Hongo, Bunkyo-ku, Tokyo, 113-0033, Japan*

Email: [inasawa@cc.tuat.ac.jp](mailto:inasawa@cc.tuat.ac.jp)

Telephone & Fax: +81-42-388-7105

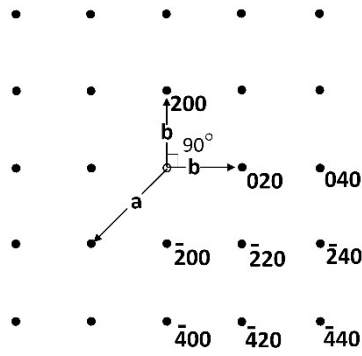

Fig. S1 Electron diffraction pattern for diamond structures. The incident direction of electron beam is  $[001]$ . Length ratio of vector  $a/b = 1.414$ . Original data from ref. 29 in the main manuscript.

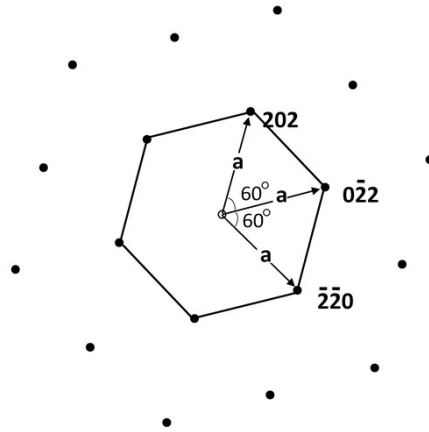

Fig. S2 Electron diffraction pattern for diamond structures. The incident direction of electron beam is  $[\bar{1}11]$ . Original data from ref. 29 in the main manuscript. Regular hexagon is drawn using six spots from  $\{220\}$  planes as shown in this figure.

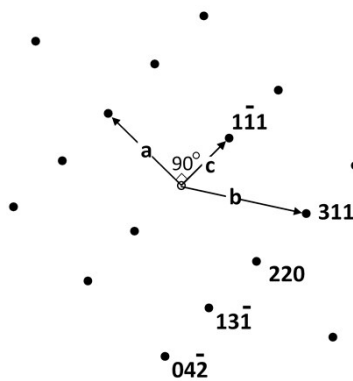

Fig. S3 Electron diffraction pattern for diamond structures. The incident direction of electron beam is

$\bar{1}12$ . Length ratios of vectors are  $b/c = 1.633$  and  $a/c = 1.915$ , respectively. Original data from ref. 29 in the main manuscript.
